# Supplementary material
Source: PubMed Central journal article supplement (PMC1779891)
Supplement: bmj_334_7585_143__1.pdf [file bmj_334_7585_143__1.pdf]

[Posted as supplied by author]

- W1 Clinical Effectiveness Group. National guideline for the management of early syphilis. *Sex Transm Inf*; 1999.75 (Suppl 1): S29-S33.
- W2 Clinical Effectiveness Group. National guideline for the management of late syphilis. *Sex Transm Inf*; 1999.75 (Suppl 1): S34-37.
- w3 [www.bashh.org/guidelines.asp](http://www.bashh.org/guidelines.asp)
- w4 WHO. [www.who.int/docstore/hiv/GRSTI/005.htm](http://www.who.int/docstore/hiv/GRSTI/005.htm)
- w5 Simms I, Ward H. Congenital syphilis in the United Kingdom. *Sex Trans Infect* 2006; 82: 1.
- w6 Communicable Disease Surveillance Centre. Outbreak of heterosexually acquired syphilis in Cambridgeshire. *Commun Dis Rep CDR Wkly* 2000; 10: 401,4.
- W7 Pugh RN, Lavery S, Simms I et al. Syphilis outbreak in Walsall: Case profiles and public health implications. *Commun Dis Public Health* 2004; 7: 27-29.
- W8 Lomax N, Anderson H, Wheeler H, Goh B. Syphilis outbreak in commercial street sex workers in East London (Abs) BHIVA 2005 [www.aegis.com/conferences/BHIVA/2005/O39.html](http://www.aegis.com/conferences/BHIVA/2005/O39.html)
- W9 Schroeter AL, Turner RH, Lucas JB, Brown WJ. Therapy for, incubating syphilis. Effectiveness of gonorrhoea treatment. *JAMA* 1971. 218: 711.
- W10 Schober PC, Gabriel G, White P et al. How infectious is syphilis? *Br J Vener Dis* 1983; 59 217-9.
- W11 Dunlop EMC. Survival of treponemes after treatment: comments, clinical conclusions, and recommendations. *Genitourin Med* 1985; 61: 293-301
- W12 Mindel A, Tovey S J, Timmins D J *et al.* Primary and secondary syphilis twenty years experience. 2. Clinical features, *Genitourin Med* . 1989; 65: 1-3
- W13 Anderson J, Mindel A, Tovey S J, Williams P. Primary and secondary syphilis twenty years experience. 3. Diagnosis,

treatment and follow up. *Genitourin Med* 1989; 65: 239-43

W14 Cohen CE, Winston A, Asboe D *et al.* Increasing detection of asymptomatic syphilis in HIV patients. *Sex Transm Infect* 2005; 81: 217 – 19

W15 Young H, (editorial) Guidelines for serological testing for syphilis. *Sex Transm Inf*, 2000: 76: 403-405

W16 HPA.MHRA. Ten Syphilis EIAs. Report No. 04109. 2004.  
[www.hpa-midas.org.uk/reports/reports\\_syphilis.asp](http://www.hpa-midas.org.uk/reports/reports_syphilis.asp)

W17 World Health Organization (Sexually Transmitted Diseases Diagnostics Initiative). Laboratory based evaluation of rapid syphilis diagnostics.  
[www.who.int/std\\_diagnostics/publications/meetings/SDI\\_Report.pdf](http://www.who.int/std_diagnostics/publications/meetings/SDI_Report.pdf)

W18 Hooshmand H, Escobar MR, Kopf SW. Neurosyphilis: a study of 241 patients. *JAMA* 1972; 219: 726-9.

W19 Doherty L, Fenton KA, Jones J *et al.* Syphilis: old problem, new strategy. *BMJ* 2002. 153-6
